# Supplementary material for: Comparison of analytical sensitivity of DNA-based and RNA-based nucleic acid amplification tests for reproductive tract infection pathogens: implications for clinical applications
Source: PubMed Central journal article supplement (PMC10581061; doi:10.1128/spectrum.01497-23), 2023-08-22
Supplement: spectrum.01497-23-s0001.pdf [file spectrum.01497-23-s0001.pdf]

## Supplementary material

**Table S1** Sequences of synthetic plasmids

| Plasmid           | Synthetic sequence                                       | Length           |
|-------------------|----------------------------------------------------------|------------------|
| Barcode plasmid   | barcode sequence                                         | 259 bp           |
| <i>CT</i> plasmid | barcode sequence and 23S rRNA of <i>CT</i> (NC_000117.1) | 259 bp + 2870 bp |
| <i>NG</i> plasmid | barcode sequence and 16S rRNA of <i>NG</i> (NR_026079.2) | 259 bp + 1541 bp |
| <i>UU</i> plasmid | barcode sequence and 16S rRNA of <i>UU</i> (NC_011374.1) | 259 bp + 1513 bp |

Abbreviations: *CT*, *Chlamydia trachomatis*; *NG*, *Neisseria gonorrhoeae*; *UU*, *Ureaplasma urealyticum*. The barcode sequence here was a 259 bp long non-coding RNA of *Arabidopsis thaliana*:

AGGGGTGTGGGAACCTAGGAGATGAGTCTGCTTATTGATTGCTAAACCCTG  
AACCCTCTCATGTAACTATGGGAATTAATACTGGGGGTCTTAGGCCGGCG  
TTTCCCCGAAAAATAATGAAAAACGTCGATGGCTACATAAGAGGCTCGT  
CTCCAAAAAGTAGACCAGGAGGTTGGGTTTGGTTCGTAGGTGGTTCTGTTG  
AAACTAGATTAGTGTCTGCGGTTAACGTTTCCTCGCCTTACCCTCCCACCC  
CC

**Table S2** The primers and probes for DNA and RNA quantification

| Plasmid/Pathogen                | Target gene      | Primer/Probe sequence (5' to 3')                                                                  |
|---------------------------------|------------------|---------------------------------------------------------------------------------------------------|
| Barcode plasmid                 | barcode sequence | QF: TTAATACTGGGGGTCTTAGGC<br>QR: CACCTACGAACCAAACCCAA<br>QP: 6-FAM-ACGTCGATGGCTACATAAGAGG-BHQ1    |
| <i>CT</i> plasmid and <i>CT</i> | 23S rDNA         | QF: TCCCTCGCCGTAAGCCCAAG<br>QR: TTTAACCTGCTGCTCCATCGT<br>QP: 6-FAM-CCAGGGTCAAGCTCGTCTTCC-BHQ1     |
| <i>NG</i> plasmid and <i>NG</i> | 16S rDNA         | QF: CAGCTAATACCGCATACTGTCT<br>QR: GCTACTGATCGTCGCCTTGGTG<br>QP: 6-FAM-CCTTTACCCCGCCAACCAGCTA-BHQ1 |

*UU* plasmid and *UU* 16S rDNA

QF: CCCTAGTAGTCCACACCGTA

QR: CCGTCAATTCCGTTTGAGTT

QP: 6-FAM-ATGTGCCTGGGTAGTACATTCG-BHQ1

---

Abbreviations: *CT*, *Chlamydia trachomatis*; *NG*, *Neisseria gonorrhoeae*; *UU*, *Ureaplasma urealyticum*.

**Table S3** Amplification efficiency of qPCR

---

| Plasmid           | Quantification curve    | R <sup>2</sup> | Amplification efficiency | Copy number ratio of target/barcode $\pm$ standard deviation |
|-------------------|-------------------------|----------------|--------------------------|--------------------------------------------------------------|
| Barcode plasmid   | $y = -3.2451x + 44.878$ | 0.9989         | 103%                     | /                                                            |
| <i>CT</i> plasmid | $y = -3.1831x + 45.298$ | 0.9994         | 106%                     | 1.067 $\pm$ 0.11                                             |
| <i>NG</i> plasmid | $y = -3.2231x + 42.924$ | 0.9983         | 103%                     | 1.174 $\pm$ 0.163                                            |
| <i>UU</i> plasmid | $y = -3.3236x + 42.477$ | 0.9952         | 99.9%                    | 1.076 $\pm$ 0.085                                            |

---

Abbreviations: *CT*, *Chlamydia trachomatis*; *NG*, *Neisseria gonorrhoeae*; *UU*, *Ureaplasma urealyticum*; R<sup>2</sup>, coefficient of determination. These ratios were obtained from six replicates of ddPCR arrays.
